# Supplementary material
Source: Springer Nature journal article supplement (https://www.springermedizin.de/resource/supplementary/13018_2010_277_MOESM6_ESM.pdf/9636684)

TR construct in AX Loading (axial load direction shown)

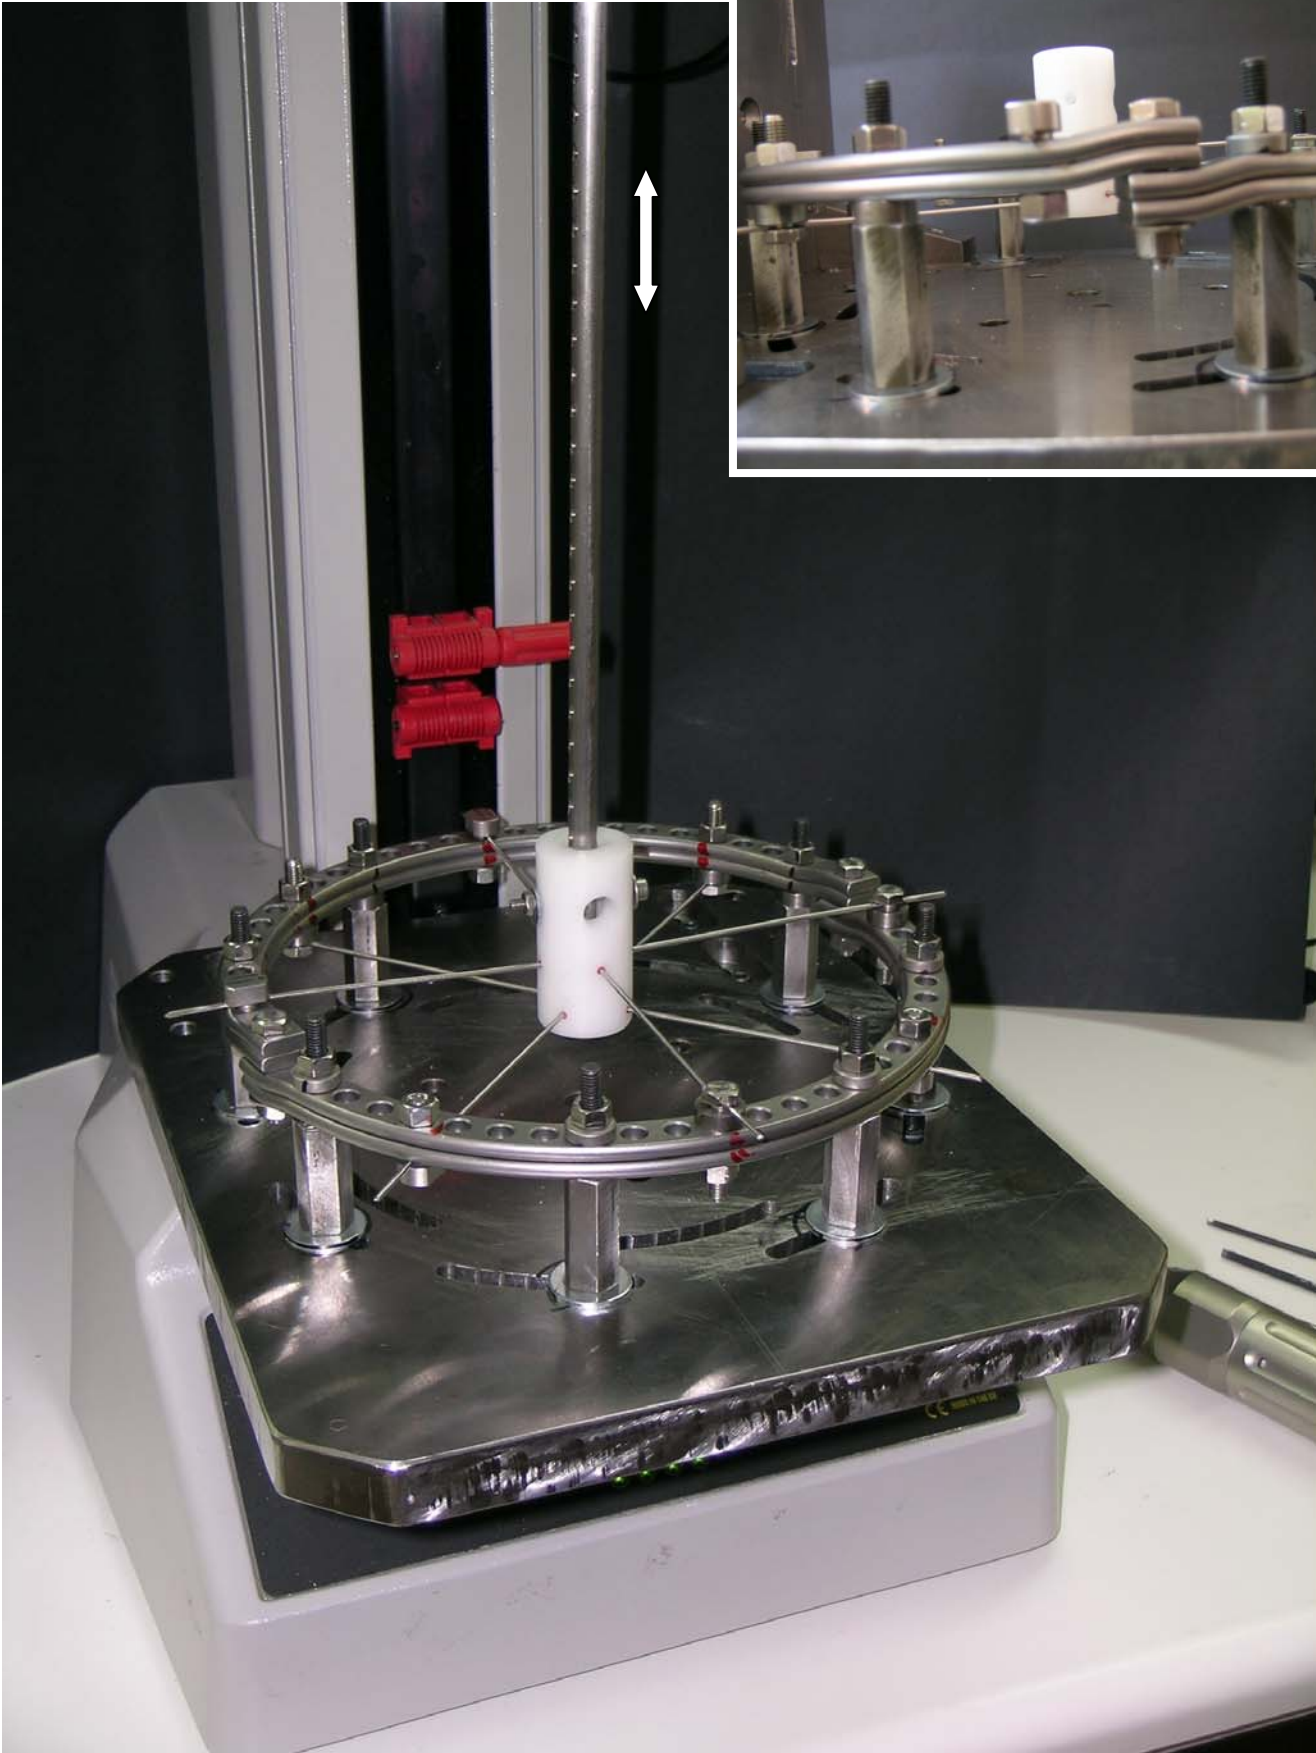

Supplement: MOESM6 [file 9636684]
